# Supplementary material
Source: Research Square preprint supplement (doi:10.21203/rs.3.rs-10178655/v1)
Supplement: Supplementary file 1 [file 02cc1527456f3d303fb063ac.docx]

# **Appendix A. Survey Instrument Response Options**

*[AUTHOR TO ADD: reproduce the verbatim closed-response options for each multi-select item, in particular the support-needs question, so that reviewers can verify which options, including training in the existing production activity, were and were not presented to respondents.]*
